# Supplementary material for: Fe3C and Mn doped Fe3C nanoparticles: synthesis, morphology and magnetic properties
Source: Royal Society of Chemistry journal article supplement (doi:10.1039/c5ra08618c), 2015-01-01
Supplement: c5ra08618c1.pdf [file c5ra08618c1.pdf]

## Supporting Information

### $\text{Fe}_3\text{C}$ and Mn doped $\text{Fe}_3\text{C}$ Nanoparticles: Synthesis, Morphology and Magnetic properties

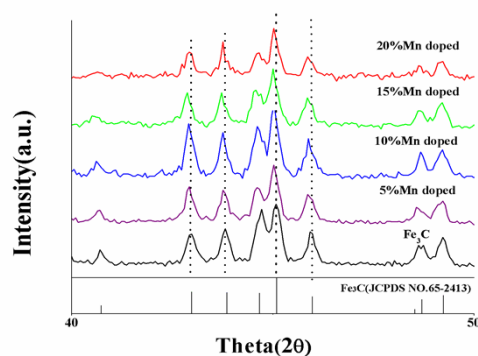

Fig.S1. Magnified XRD patterns of  $\text{Fe}_3\text{C}$  and Mn doped  $\text{Fe}_3\text{C}$  NPs (40-50 degree).

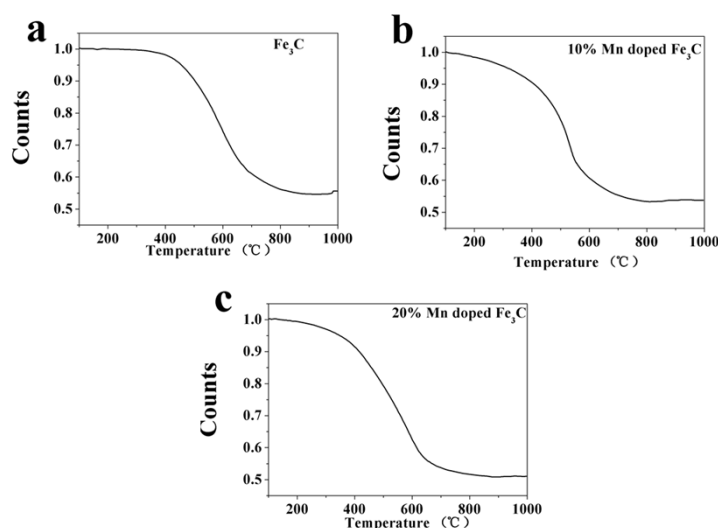

Fig.S2. TGA curves of  $\text{Fe}_3\text{C}$ , 10% and 20% Mn doped  $\text{Fe}_3\text{C}$  measured from 100 to 1000 °C in atmospheric air.

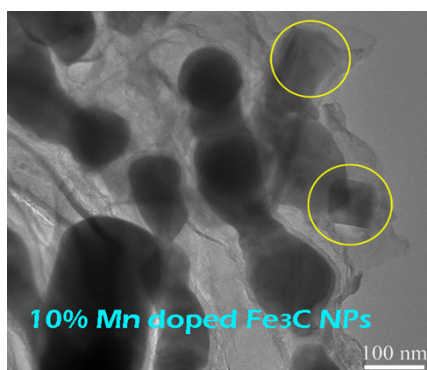

Fig.S3. TEM image of 10% Mn doped  $\text{Fe}_3\text{C}$  NPs.
